# Supplementary material
Source: Springer Nature journal article supplement (https://www.springermedizin.de/resource/supplementary/12985_2010_957_MOESM3_ESM.pdf/9608832)

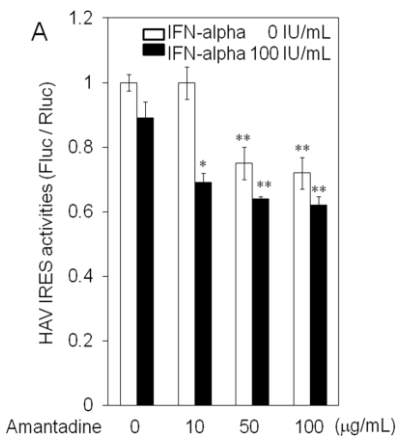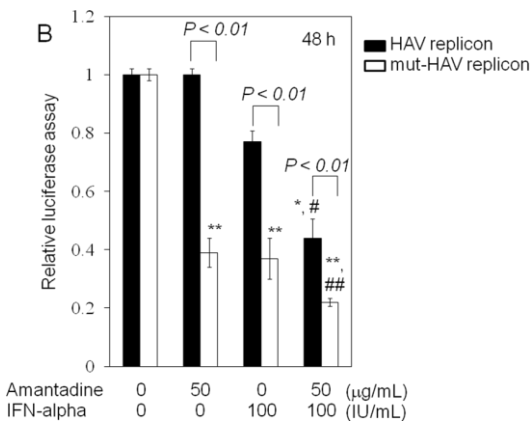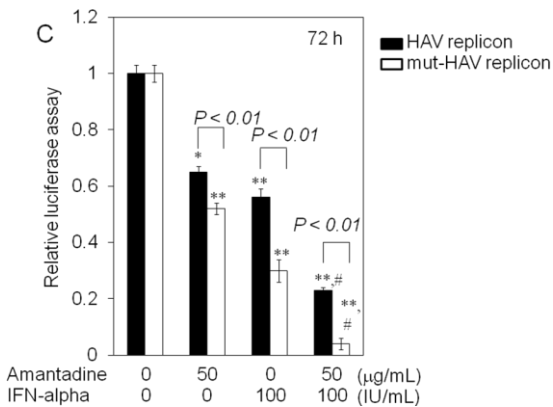

Supplement: MOESM3 [file 9608832]
